# Supplementary material
Source: MDPI journal article supplement (https://www.mdpi.com/2073-445X/8/1/14)
Supplement: s1 [file s1]

# New 1 km Resolution Datasets of Global and Regional Risks of Tree Cover Loss

Jennifer Hewson, Stefano C. Crema, Mariano González-Roglich, Karyn Tabor and Celia A. Harvey

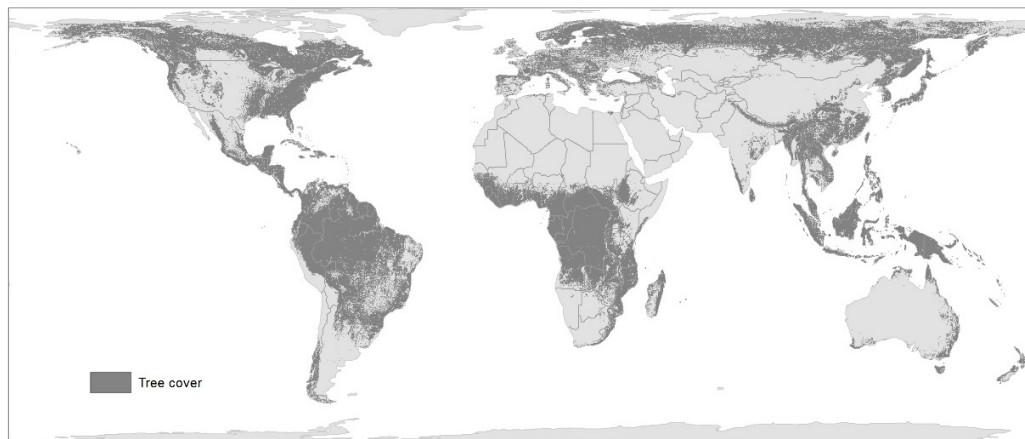

**Figure S1.** 1 km tree cover extent map for 2014

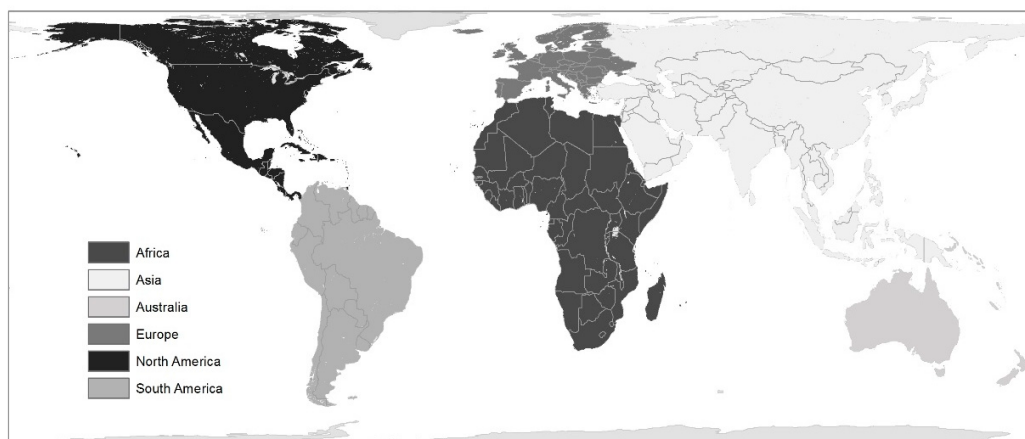

**Figure S2.** Six regions used for the regional scale analyses

**Table S1.** Test performed in the Multi-Layer perceptron (MLP) neural network model process to evaluate the importance of each variable in the model by forcing a single independent variable to be constant and generating results using all other combinations

| Model              | Accuracy (%) | Skill measure | Order of Influence     |
|--------------------|--------------|---------------|------------------------|
| With all variables | 80.71        | 0.6142        | N/A                    |
| Var. 1 constant    | 80.50        | 0.6099        | 12                     |
| Var. 2 constant    | 80.52        | 0.6104        | 13                     |
| Var. 3 constant    | 80.14        | 0.6027        | 7                      |
| Var. 4 constant    | 80.36        | 0.6073        | 9                      |
| Var. 5 constant    | 77.98        | 0.5597        | 1 (most influential)   |
| Var. 6 constant    | 79.96        | 0.5993        | 4                      |
| Var. 7 constant    | 80.65        | 0.6129        | 15                     |
| Var. 8 constant    | 80.46        | 0.6092        | 11                     |
| Var. 9 constant    | 80.81        | 0.6163        | 18 (least influential) |
| Var. 10 constant   | 80.70        | 0.6140        | 17                     |
| Var. 11 constant   | 78.34        | 0.5669        | 2                      |
| Var. 12 constant   | 79.81        | 0.5962        | 3                      |
| Var. 13 constant   | 80.09        | 0.6017        | 5                      |
| Var. 14 constant   | 80.36        | 0.6072        | 8                      |
| Var. 15 constant   | 80.66        | 0.6131        | 16                     |
| Var. 16 constant   | 80.61        | 0.6122        | 14                     |
| Var. 17 constant   | 80.13        | 0.6026        | 6                      |
| Var. 18 constant   | 80.40        | 0.6080        | 10                     |

**Table S2.** Test performed in the Multi-Layer perceptron (MLP) neural network model process to highlight the interactions that exist among the variables by forcing all independent variables except one to be constant

| Model                    | Accuracy (%) | Skill measure |
|--------------------------|--------------|---------------|
| With all variables       | 80.71        | 0.6142        |
| All constant but var. 1  | 50.13        | 0.0025        |
| All constant but var. 2  | 50.13        | 0.0025        |
| All constant but var. 3  | 50.05        | 0.0010        |
| All constant but var. 4  | 50.13        | 0.0025        |
| All constant but var. 5  | 67.55        | 0.3511        |
| All constant but var. 6  | 51.59        | 0.0318        |
| All constant but var. 7  | 50.13        | 0.0025        |
| All constant but var. 8  | 50.13        | 0.0025        |
| All constant but var. 9  | 50.13        | 0.0025        |
| All constant but var. 10 | 50.13        | 0.0025        |
| All constant but var. 11 | 66.81        | 0.3362        |
| All constant but var. 12 | 50.63        | 0.0126        |
| All constant but var. 13 | 50.13        | 0.0025        |
| All constant but var. 14 | 51.13        | 0.0226        |
| All constant but var. 15 | 50.13        | 0.0025        |
| All constant but var. 16 | 50.13        | 0.0025        |
| All constant but var. 17 | 61.94        | 0.2389        |
| All constant but var. 18 | 50.13        | 0.0025        |

**Table S3.** Backwards elimination stepwise test performed in the Multi-Layer perceptron (MLP) neural network model process to assess the impact of each variable on the overall accuracy of the model; example from the global model

| Model                                                         | Variables included                           | Accuracy (%) | Skill measure |
|---------------------------------------------------------------|----------------------------------------------|--------------|---------------|
| With all variables                                            | All variables                                | 80.71        | 0.6142        |
| Step 1: var.[9] constant                                      | [1,2,3,4,5,6,7,8,10,11,12,13,14,15,16,17,18] | 80.81        | 0.6163        |
| Step 2: var.[9,10] constant                                   | [1,2,3,4,5,6,7,8,11,12,13,14,15,16,17,18]    | 80.79        | 0.6158        |
| Step 3: var.[9,10,15] constant                                | [1,2,3,4,5,6,7,8,11,12,13,14,16,17,18]       | 80.72        | 0.6145        |
| Step 4: var.[9,10,15,7] constant                              | [1,2,3,4,5,6,8,11,12,13,14,16,17,18]         | 80.58        | 0.6116        |
| Step 5: var.[9,10,15,7,16] constant                           | [1,2,3,4,5,6,8,11,12,13,14,17,18]            | 80.53        | 0.6106        |
| Step 6: var.[9,10,15,7,16,1] constant                         | [2,3,4,5,6,8,11,12,13,14,17,18]              | 80.38        | 0.6077        |
| Step 7: var.[9,10,15,7,16,1,17] constant                      | [2,3,4,5,6,8,11,12,13,14,18]                 | 80.18        | 0.6035        |
| Step 8: var.[9,10,15,7,16,1,17,18] constant                   | [2,3,4,5,6,8,11,12,13,14]                    | 79.90        | 0.5981        |
| Step 9: var.[9,10,15,7,16,1,17,18,14] constant                | [2,3,4,5,6,8,11,12,13]                       | 79.92        | 0.5984        |
| Step 10: var.[9,10,15,7,16,1,17,18,14,4] constant             | [2,3,5,6,8,11,12,13]                         | 80.12        | 0.6023        |
| Step 11: var.[9,10,15,7,16,1,17,18,14,4,8] constant           | [2,3,5,6,11,12,13]                           | 79.92        | 0.5984        |
| Step 12: var.[9,10,15,7,16,1,17,18,14,4,8,2] constant         | [3,5,6,11,12,13]                             | 79.41        | 0.5881        |
| Step 13: var.[9,10,15,7,16,1,17,18,14,4,8,2,13] constant      | [3,5,6,11,12]                                | 78.85        | 0.5770        |
| Step 14: var.[9,10,15,7,16,1,17,18,14,4,8,2,13,3] constant    | [5,6,11,12]                                  | 78.14        | 0.5627        |
| Step 15: var.[9,10,15,7,16,1,17,18,14,4,8,2,13,3,12] constant | [5,6,11]                                     | 77.10        | 0.5419        |

|                                                                          |        |       |        |
|--------------------------------------------------------------------------|--------|-------|--------|
| Step 16:<br>var.[9,10,15,7,16,1,17,18,14,4,8,2,13,3,12,6]<br>constant    | [5,11] | 75.88 | 0.5175 |
| Step 17:<br>var.[9,10,15,7,16,1,17,18,14,4,8,2,13,3,12,6,11]<br>constant | [5]    | 67.55 | 0.3511 |

**Table S4.** Driver variables (including both quantitative variables and the Normalized Likelihood (NL) of qualitative variables) for the six regional analyses, ordered by relative importance

| Relative Importance | Africa                | Australia           | Asia                  | Europe                | N America             | S America           |
|---------------------|-----------------------|---------------------|-----------------------|-----------------------|-----------------------|---------------------|
| 1                   | AGB                   | precipitation       | ecoregions (NL)       | countries (NL)        | biomes (NL)           | AGB                 |
| 2                   | countries (NL)        | slope               | distance to airports  | mean temperature      | ecoregions (NL)       | slope               |
| 3                   | Human Influence Index | mean temperature    | distance to trails    | slope                 | countries (NL)        | precipitation       |
| 4                   | precipitation         | protected area (NL) | crop suitability      | irrigation area       | AGB                   | distance to roads   |
| 5                   | distance to trails    | distance to trails  | distance to railroads | crop suitability      | distance to roads     | opportunity cost    |
| 6                   | protected area (NL)   | biomes (NL)         | AGB                   | AGB                   | distance to railroads | ecoregions (NL)     |
| 7                   | distance to railroads | AGB                 | slope                 | precipitation         | crop suitability      | protected area (NL) |
| 8                   | slope                 | elevation           | mean temperature      | World population 2000 | elevation             | countries (NL)      |
| 9                   | elevation             | crop suitability    | elevation             | Human Influence Index | precipitation         | soil drainage (NL)  |

|    |                       |                         |                         |                         |                         |                         |
|----|-----------------------|-------------------------|-------------------------|-------------------------|-------------------------|-------------------------|
| 10 | mean temperature      | irrigation area         | World population 2000   | distance to airports    | mean temperature        | mean temperature        |
| 11 | crop suitability      | Human Influence Index   | countries (NL)          | distance to trails      | distance to airports    | crop suitability        |
| 12 | ecoregions (NL)       | soil drainage (NL)      | distance to urban areas | soil drainage (NL)      | irrigation area         | soil pH (NL)            |
| 13 | distance to airports  | soil texture (NL)       | irrigation area         | biomes (NL)             | soil texture (NL)       | biomes (NL)             |
| 14 | biomes (NL)           | countries (NL)          | soil drainage (NL)      | ecoregions (NL)         | soil pH (NL)            | distance to urban areas |
| 15 | irrigation area       | ecoregions (NL)         | precipitation           | elevation               | slope                   | elevation               |
| 16 | World population 2000 | distance to roads       | Human Influence Index   | opportunity cost        | distance to urban areas | soil depth (NL)         |
| 17 | soil pH (NL)          | distance to urban areas |                         | distance to railroads   | Human Influence Index   | distance to airports    |
| 18 | soil drainage (NL)    |                         |                         | soil texture (NL)       | soil drainage (NL)      |                         |
| 19 |                       |                         |                         | distance to roads       |                         |                         |
| 20 |                       |                         |                         | soil depth (NL)         |                         |                         |
| 21 |                       |                         |                         | distance to urban areas |                         |                         |
| 22 |                       |                         |                         | soil pH (NL)            |                         |                         |
| 23 |                       |                         |                         | protected area (NL)     |                         |                         |
